# Supplementary material for: Integrating Primary Care Into Assertive Community Treatment
Source: Atypon-hosted journal article supplement (doi:10.1176/appi.ps.202100069), 2021-09-09

**ACT team characteristics and primary care support**

| <b>Program</b>                     | <b>Co-located PCP</b>                                               | <b>Field-visiting PCP</b> | <b>January 2019<br/>N</b> | <b>July 2019<br/>N</b> |
|------------------------------------|---------------------------------------------------------------------|---------------------------|---------------------------|------------------------|
| Bronx Team                         | None                                                                | None                      | 35                        | 73                     |
| Brooklyn Team 1                    | FQHC                                                                | 2 days / month            | 67                        | 67                     |
| Brooklyn Team 2                    | FQHC                                                                | 2 days / month            | 66                        | 65                     |
| Brooklyn Team 3                    | FQHC                                                                | 2 days total / 6 months   | 61                        | 61                     |
| Brooklyn Team 4<br>(Shelter-based) | FQHC;<br>Shelter-based PCP available<br>in 2 of 4 assigned shelters | 2 days / month            | 36                        | 57                     |
| Brooklyn Team 5<br>(Shelter-based) | Shelter-based PCP in 1 of 4<br>assigned shelters                    | 2 days total / 6 months   | 44                        | 55                     |
| <b>TOTAL N</b>                     |                                                                     |                           | <b>309</b>                | <b>378</b>             |

**Proportion of ACT team participants with A1c screening in past year, by team**

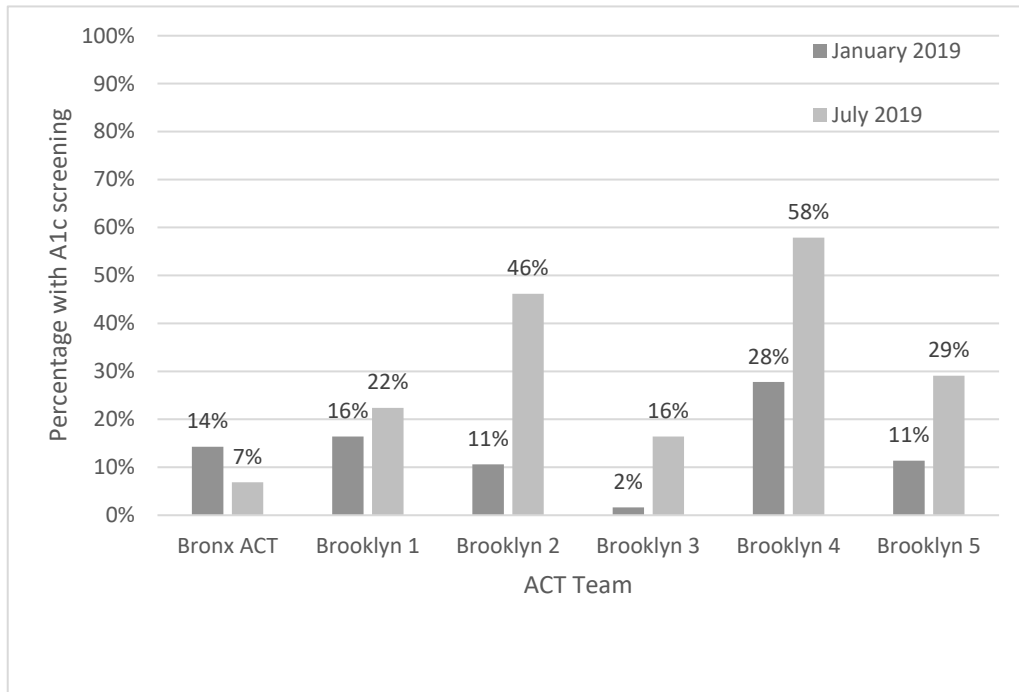

**Proportion of ACT team participants with cholesterol screening in past year, by team**

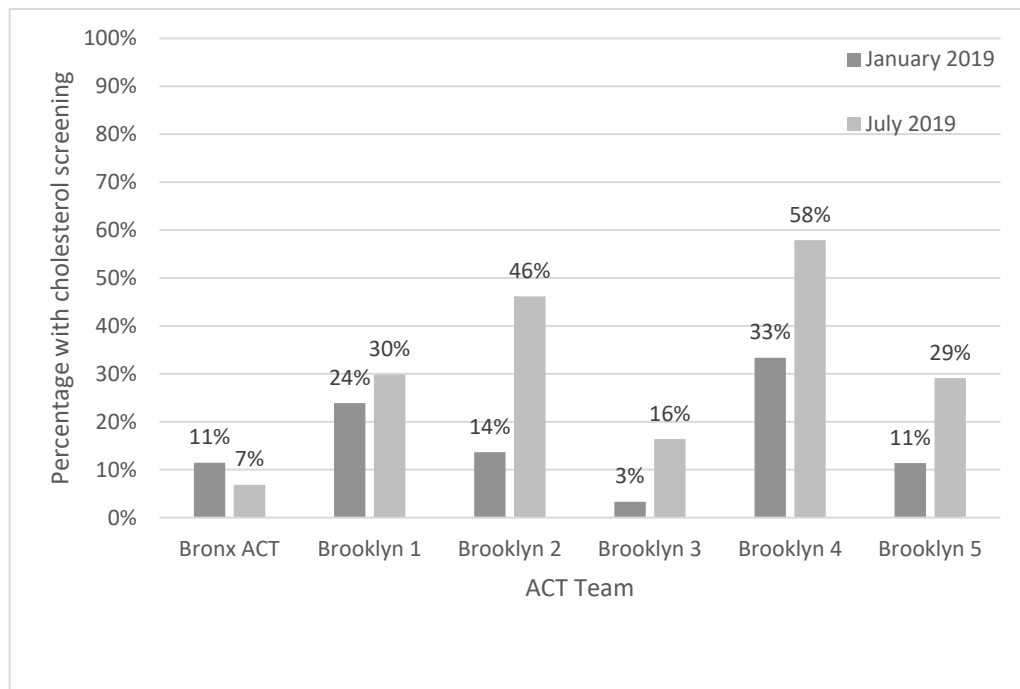

Supplement: appi.ps.202100069.ds001.pdf [file appi.ps.202100069.ds001.pdf]
